# Supplementary material for: Wnt signaling determines ventral spinal cord cell fates in a time-dependent manner
Source: Oxford University Press journal article supplement (doi:10.1242/dev.021899), 2008-10-16

TM E8.5 → E11.5

Msx1/2

Msx1/2/ $\beta$ -gal

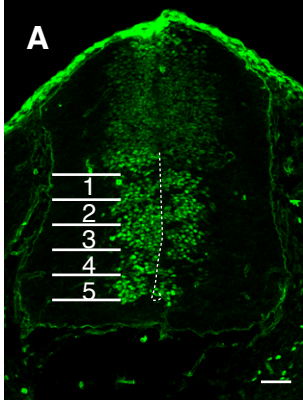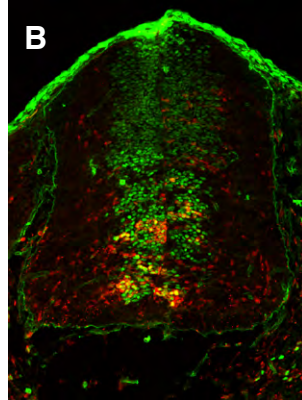

**E** ectopic Msx+ cells @E11.5

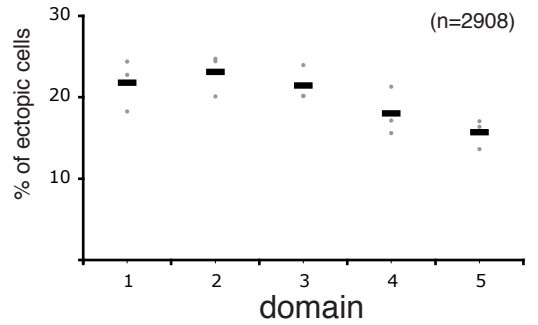

Pax7

Pax7/ $\beta$ -gal

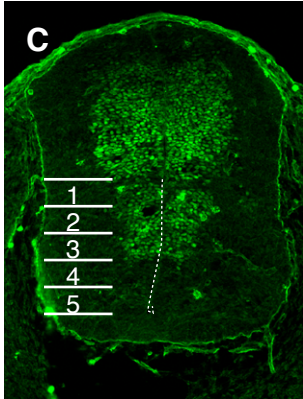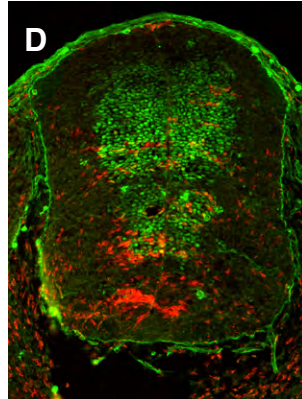

**F** ectopic Pax7+ cells @E11.5

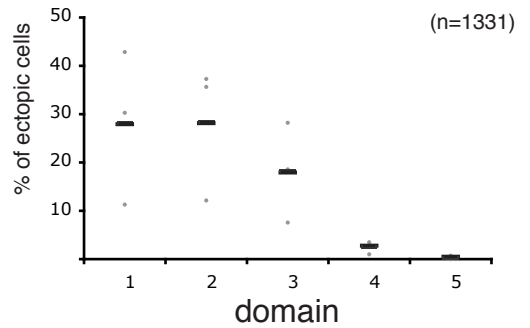

Control

TM E7

TM E8

TM E9

*Gli1CreER;Tcf-lacZ*

*Gli1CreER;Ctnnb19<sup>of</sup>;Tcf-lacZ*

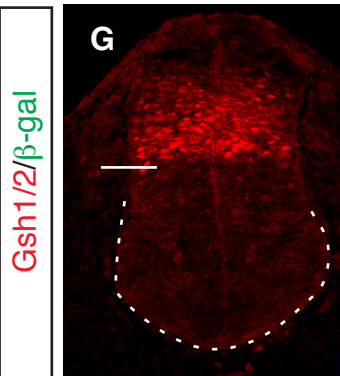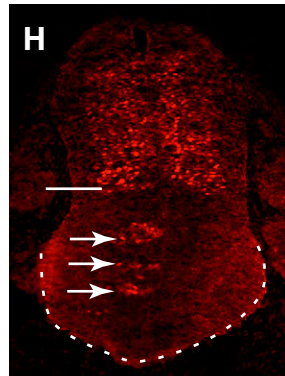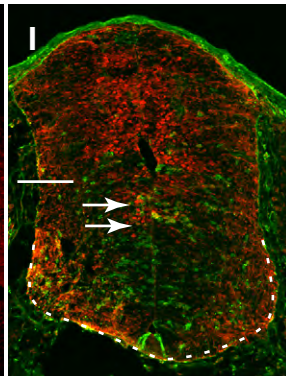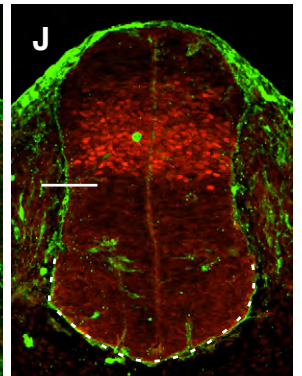

Supplement: dev021899-sup-021899-figs1.pdf [file dev021899-sup-021899-figs1.pdf]
