# Supplementary material for: Wnt signaling determines ventral spinal cord cell fates in a time-dependent manner
Source: Oxford University Press journal article supplement (doi:10.1242/dev.021899), 2008-10-16

*Olig1-Cre; R26R/+*

E9.5

E10.5

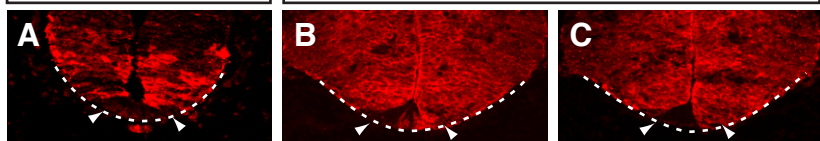

WT

*Olig1-Cre; Ctnnb1<sup>9of</sup>; R26R/+*

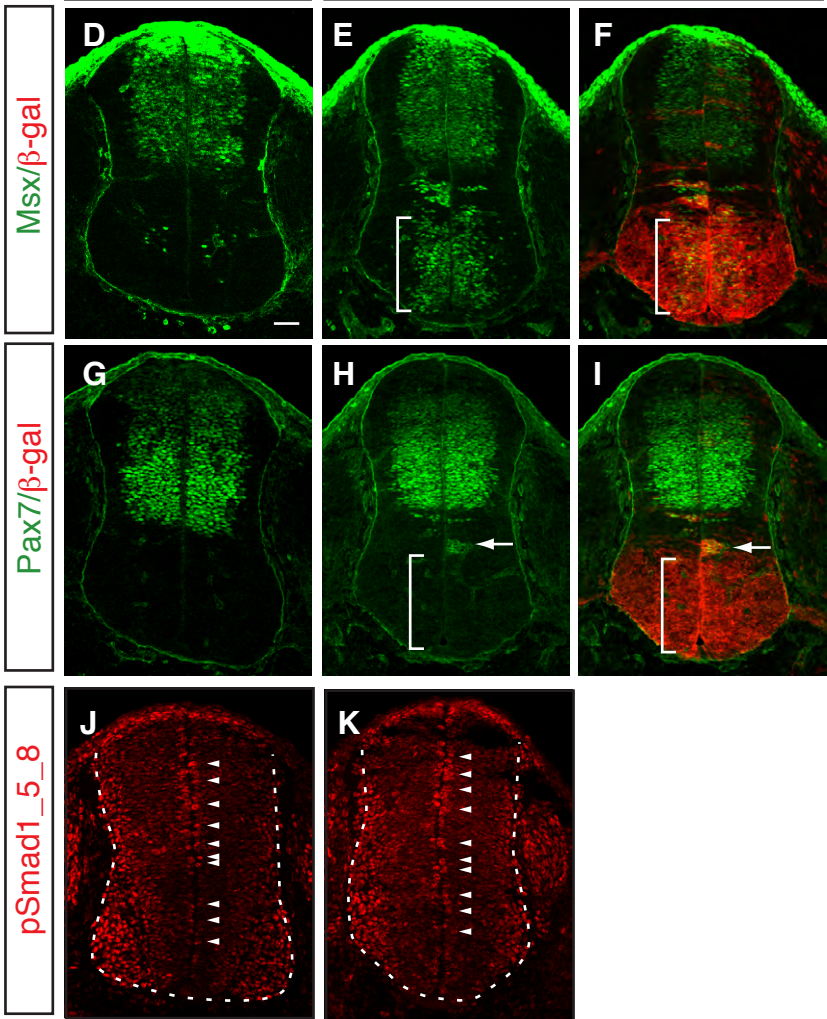

WT

*Olig1-Cre,*  
*Ctnnb1<sup>9of</sup>*

*Olig1-Cre,*  
*Ctnnb1<sup>9of</sup>; Gli3*

Nkx6.1

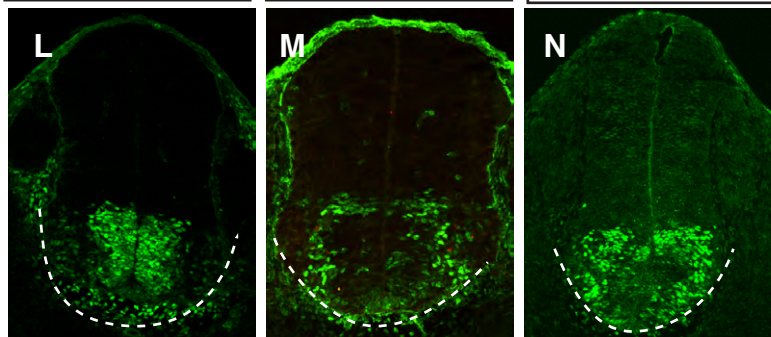

Supplement: dev021899-sup-021899-figs2.pdf [file dev021899-sup-021899-figs2.pdf]
