# Supplementary material for: Wnt signaling determines ventral spinal cord cell fates in a time-dependent manner
Source: Oxford University Press journal article supplement (doi:10.1242/dev.021899), 2008-10-16

*Olig1-Cre;Ctnn9<sup>of</sup>;R26R/+*

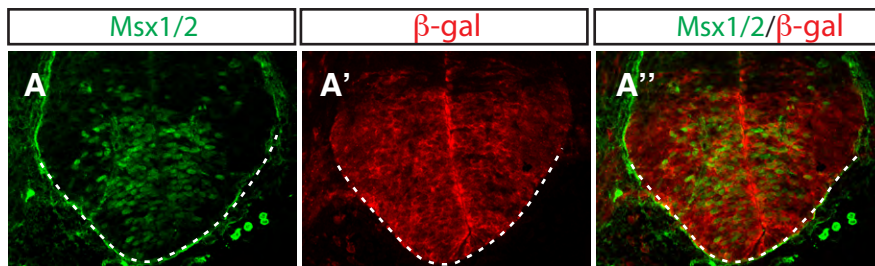

percentage of co-staining:  
96.1% (488/505, n=5)

*Olig1-Cre;Ctnn9<sup>of</sup>;Tcf-lacZ*

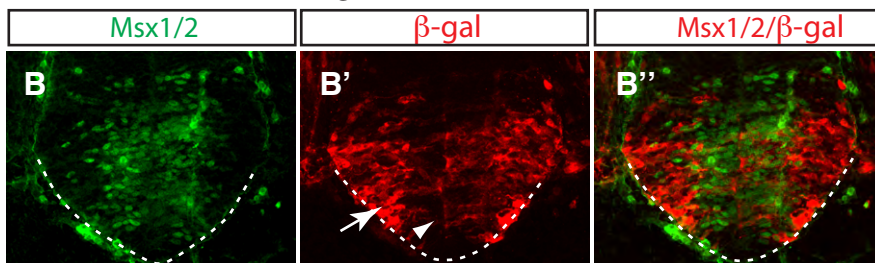

**C.** Percentage of ectopic *Msx1/2* or *Pax7* cells co-expressing  $\beta$ -galactosidase in *Gli1-CreER;Ctnn9<sup>of</sup>;Tcf-lacZ* embryos

|            | co-staining of <i>Pax7</i> / $\beta$ -gal |                  | co-staining of <i>Msx</i> / $\beta$ -gal |                    |
|------------|-------------------------------------------|------------------|------------------------------------------|--------------------|
|            | E7.5                                      | E8.5             | E7.5                                     | E8.5               |
| Percentage | 72.4%<br>(95/127)                         | 81.1%<br>(60/74) | 82.9%<br>(247/298)                       | 91.1%<br>(263/292) |
| Sections   | 9                                         | 3                | 9                                        | 3                  |

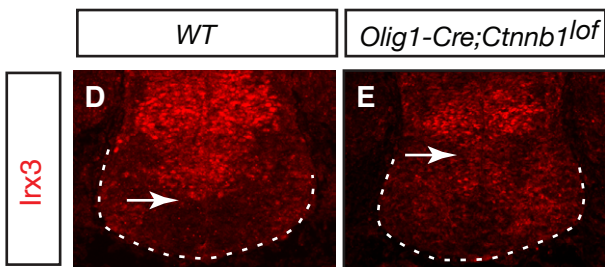

Supplement: dev021899-sup-021899-figs6.pdf [file dev021899-sup-021899-figs6.pdf]
