# Supplementary figures and images for: Wnt signaling determines ventral spinal cord cell fates in a time-dependent manner
Source: Oxford University Press journal article supplement (doi:10.1242/dev.021899), 2008-10-16

*Gli1*

*Ptch1*

*Shh*

WT

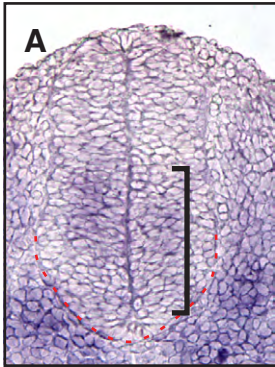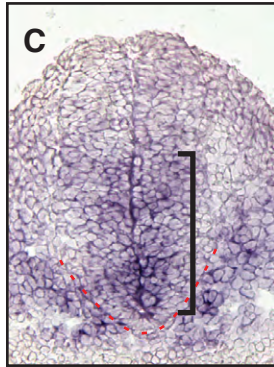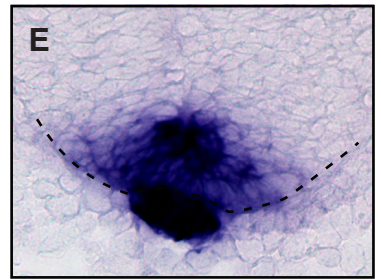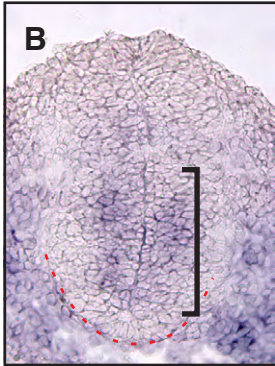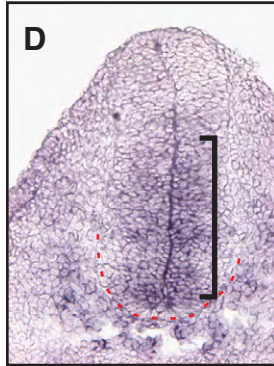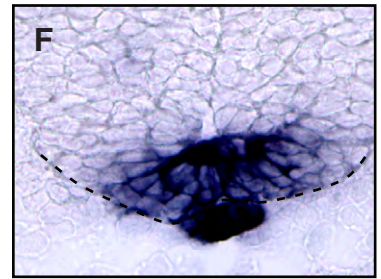

*Olig1-Cre;*  
*Ctnnb1<sup>lof</sup>*

**G**

Shh+ floor plate cells/slide

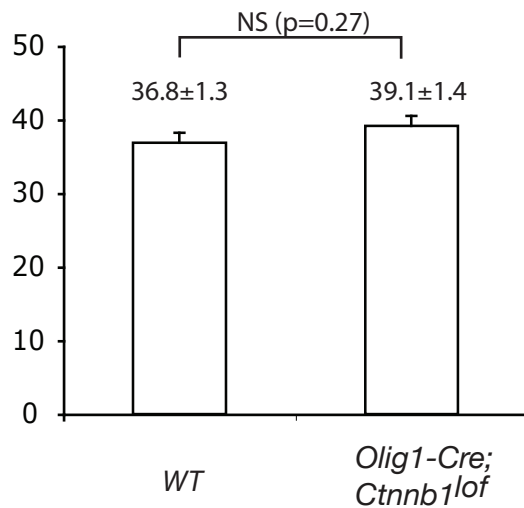

Supplement: dev021899-sup-021899-figs3.pdf [file dev021899-sup-021899-figs3.pdf]

*Ptch1*

*Gli1*

*Gli2*

*WT*

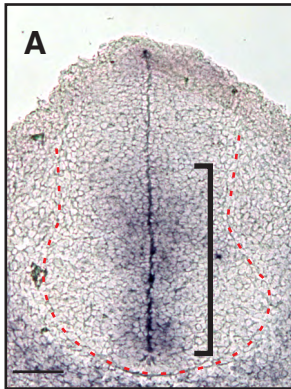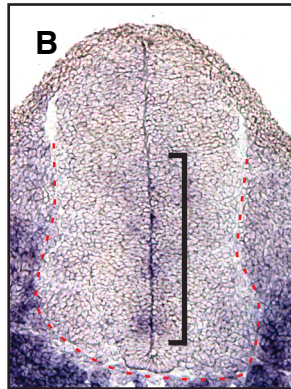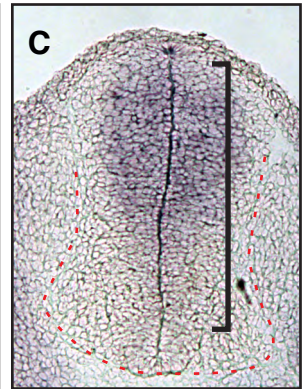

*Olig1-Cre;  
Ctnnb1<sup>lof</sup>*

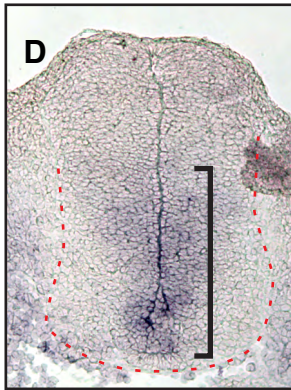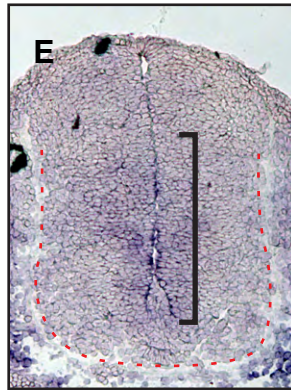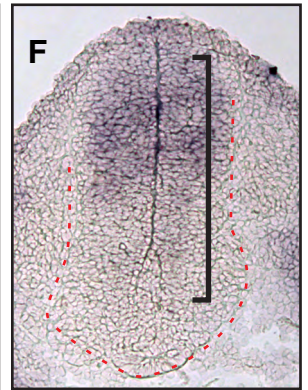

*Olig1-Cre;  
Ctnnb1<sup>9of</sup>*

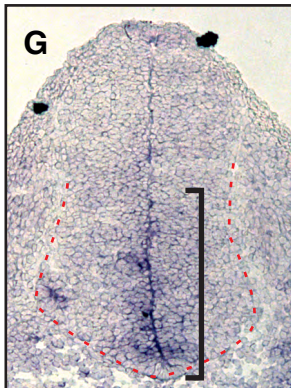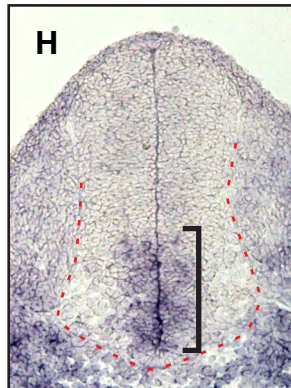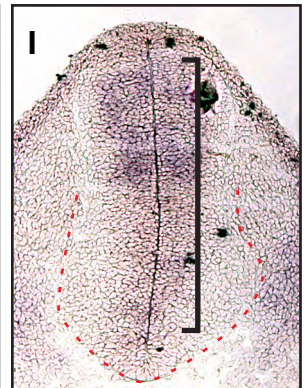

Supplement: dev021899-sup-021899-figs4.pdf [file dev021899-sup-021899-figs4.pdf]

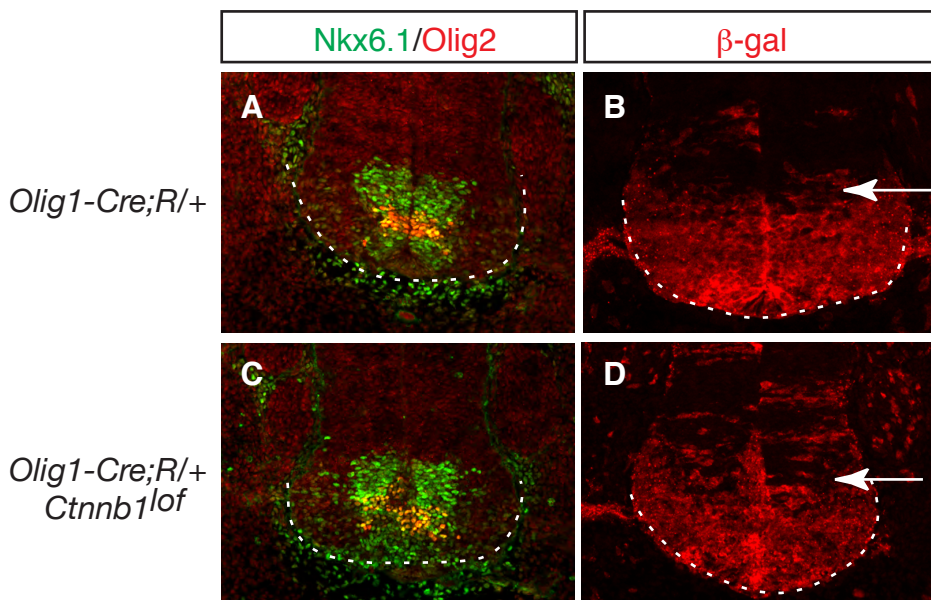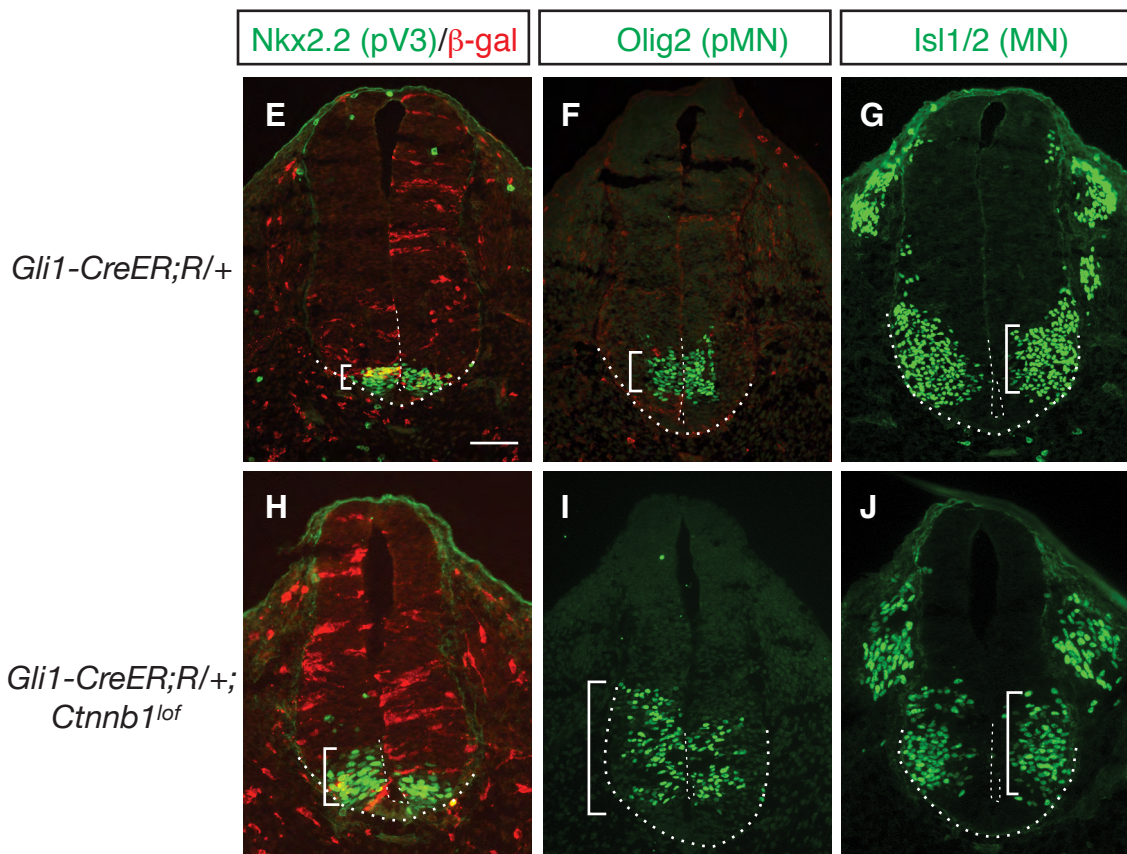

Supplement: dev021899-sup-021899-figs5.pdf [file dev021899-sup-021899-figs5.pdf]
